# Supplementary material
Source: PubMed Central journal article supplement (PMC2980783)
Supplement: NIHMS225143-supplement-1_si_001.pdf [file NIHMS225143-supplement-1_si_001.pdf]

## Supporting Information

**Table S1.** Complete Crystallographic Details for [Fe(TEtP\*)(Cl)]SbCl<sub>6</sub>

|                                                              |                                                                                                     |
|--------------------------------------------------------------|-----------------------------------------------------------------------------------------------------|
| formula                                                      | C <sub>28</sub> H <sub>28</sub> Cl <sub>7</sub> FeN <sub>4</sub> Sb·CH <sub>2</sub> Cl <sub>2</sub> |
| FW, amu                                                      | 931.22                                                                                              |
| <i>a</i> , Å                                                 | 9.768(2)                                                                                            |
| <i>b</i> , Å                                                 | 13.585(3)                                                                                           |
| <i>c</i> , Å                                                 | 14.508(3)                                                                                           |
| $\alpha$ , deg                                               | 76.90(3)                                                                                            |
| $\beta$ , deg                                                | 87.32(3)                                                                                            |
| $\gamma$ , deg                                               | 71.77(3)                                                                                            |
| <i>V</i> , Å <sup>3</sup>                                    | 1780.2(6)                                                                                           |
| space group                                                  | <i>P</i> $\bar{1}$                                                                                  |
| <i>Z</i>                                                     | 2                                                                                                   |
| D <sub>c</sub> , g/cm <sup>3</sup>                           | 1.737                                                                                               |
| F(000)                                                       | 924                                                                                                 |
| $\mu$ , mm <sup>-1</sup>                                     | 1.870                                                                                               |
| power and current settings                                   | 50kV, 30mA                                                                                          |
| detector distance, mm                                        | 40                                                                                                  |
| detector tilt angle, deg                                     | -25                                                                                                 |
| image time, sec                                              | 10                                                                                                  |
| increment, deg                                               | 0.20                                                                                                |
| crystal dimensions, mm                                       | 0.30 × 0.20 × 0.11                                                                                  |
| radiation                                                    | MoK $\alpha$ , $\bar{\lambda}$ = 0.71073 Å                                                          |
| temperature, K                                               | 130(2)                                                                                              |
| diffractometer                                               | Enraf Nonius FAST                                                                                   |
| $\theta$ range for collected data, deg                       | 2.20–29.95                                                                                          |
| index range                                                  | -13 ≤ <i>h</i> ≤ 12<br>-13 ≤ <i>k</i> ≤ 18<br>-17 ≤ <i>l</i> ≤ 20                                   |
| total data collected                                         | 17182                                                                                               |
| unique data                                                  | 9071 ( <i>R</i> <sub>int</sub> = 0.0753)                                                            |
| unique observed data [ <i>I</i> > 2 $\sigma$ ( <i>I</i> )]   | 7801                                                                                                |
| refinement method                                            | Full-matrix least-squares                                                                           |
| data/restraints/parameters                                   | 9071 / 0 / 434                                                                                      |
| goodness-of-fit (based on <i>F</i> <sup>2</sup> )            | 1.045                                                                                               |
| max( $\Delta\rho$ ), e/Å <sup>3</sup>                        | 1.46                                                                                                |
| min( $\Delta\rho$ ), e/Å <sup>3</sup>                        | -1.71                                                                                               |
| final <i>R</i> indices [ <i>I</i> > 2 $\sigma$ ( <i>I</i> )] | <i>R</i> <sub>1</sub> = 0.0516, <i>wR</i> <sub>2</sub> = 0.1213                                     |
| final <i>R</i> indices (all data)                            | <i>R</i> <sub>1</sub> = 0.0632, <i>wR</i> <sub>2</sub> = 0.1286                                     |

**Table S2.** Atomic Coordinates and Equivalent Isotropic Displacement Parameters ( $\text{\AA}^2$ ) for  $[\text{Fe}(\text{TEtP}^*)(\text{Cl})]\text{SbCl}_6^a$

| atom   | $x$         | $y$        | $z$          | $U(\text{eq})$ |
|--------|-------------|------------|--------------|----------------|
| Fe(1)  | -0.23871(5) | 0.02041(4) | 0.09616(3)   | 0.0130(1)      |
| Cl(1)  | -0.47021(9) | 0.08480(8) | 0.07469(7)   | 0.0272(2)      |
| N(1)   | -0.1937(3)  | 0.1134(2)  | 0.17896(19)  | 0.0165(5)      |
| N(2)   | -0.1675(3)  | 0.1119(2)  | -0.01806(18) | 0.0142(5)      |
| N(3)   | -0.1858(3)  | -0.0986(2) | 0.02224(18)  | 0.0137(5)      |
| N(4)   | -0.2095(3)  | -0.0978(2) | 0.21820(19)  | 0.0189(5)      |
| C(a1)  | -0.2106(4)  | 0.1005(3)  | 0.2756(2)    | 0.0212(7)      |
| C(a2)  | -0.1818(4)  | 0.2133(3)  | 0.1472(2)    | 0.0203(6)      |
| C(a3)  | -0.1617(3)  | 0.2135(3)  | -0.0234(2)   | 0.0176(6)      |
| C(a4)  | -0.1603(3)  | 0.0991(3)  | -0.1092(2)   | 0.0152(6)      |
| C(a5)  | -0.1732(3)  | -0.0850(3) | -0.0749(2)   | 0.0153(6)      |
| C(a6)  | -0.1995(3)  | -0.1986(3) | 0.0534(2)    | 0.0179(6)      |
| C(a7)  | -0.2118(4)  | -0.2005(3) | 0.2249(3)    | 0.0234(7)      |
| C(a8)  | -0.2147(4)  | -0.0852(3) | 0.3098(2)    | 0.0241(7)      |
| C(b1)  | -0.2076(5)  | 0.1943(3)  | 0.3036(3)    | 0.0297(8)      |
| C(b2)  | -0.1893(5)  | 0.2631(3)  | 0.2253(3)    | 0.0297(8)      |
| C(b3)  | -0.1503(4)  | 0.2642(3)  | -0.1213(3)   | 0.0237(7)      |
| C(b4)  | -0.1496(4)  | 0.1942(3)  | -0.1733(2)   | 0.0217(7)      |
| C(b5)  | -0.1762(4)  | -0.1790(3) | -0.1032(2)   | 0.0195(6)      |
| C(b6)  | -0.1940(4)  | -0.2481(3) | -0.0243(3)   | 0.0216(7)      |
| C(b7)  | -0.2143(6)  | -0.2525(4) | 0.3222(3)    | 0.0377(10)     |
| C(b8)  | -0.2163(5)  | -0.1817(4) | 0.3744(3)    | 0.0359(9)      |
| C(m1)  | -0.2226(4)  | 0.0092(3)  | 0.3375(2)    | 0.0239(7)      |
| C(m2)  | -0.1665(4)  | 0.2615(3)  | 0.0526(2)    | 0.0190(6)      |
| C(m3)  | -0.1630(3)  | 0.0068(3)  | -0.1376(2)   | 0.0164(6)      |
| C(m4)  | -0.2143(4)  | -0.2468(3) | 0.1485(3)    | 0.0223(7)      |
| C(11a) | -0.2665(15) | 0.0083(17) | 0.4393(14)   | 0.029(2)       |
| C(12a) | -0.4260(9)  | 0.0118(7)  | 0.4565(6)    | 0.0305(16)     |
| C(11b) | -0.2221(14) | 0.0139(17) | 0.4413(14)   | 0.029(2)       |
| C(12b) | -0.0707(9)  | -0.0140(7) | 0.4837(5)    | 0.0321(17)     |
| C(21)  | -0.1659(4)  | 0.3754(3)  | 0.0310(3)    | 0.0248(7)      |
| C(22)  | -0.3193(5)  | 0.4519(3)  | 0.0144(4)    | 0.0372(10)     |
| C(31)  | -0.1633(4)  | 0.0099(3)  | -0.2424(2)   | 0.0224(7)      |
| C(32)  | -0.3170(5)  | 0.0491(4)  | -0.2832(3)   | 0.0358(9)      |

**Table S2.** Continued

| atom   | <i>x</i>     | <i>y</i>    | <i>z</i>     | <i>U</i> (eq) |
|--------|--------------|-------------|--------------|---------------|
| C(41)  | -0.2435(5)   | -0.3529(3)  | 0.1684(3)    | 0.0325(9)     |
| C(42)  | -0.4053(6)   | -0.3360(4)  | 0.1656(5)    | 0.0528(14)    |
| Sb(1)  | -0.26385(3)  | 0.63664(2)  | -0.31326(2)  | 0.0231(1)     |
| Cl(2a) | -0.0985(5)   | 0.5718(9)   | -0.4274(6)   | 0.0389(19)    |
| Cl(2b) | -0.0935(4)   | 0.5255(9)   | -0.3948(7)   | 0.065(2)      |
| Cl(3)  | -0.42624(17) | 0.71309(12) | -0.44384(8)  | 0.0546(4)     |
| Cl(4)  | -0.16025(16) | 0.77650(11) | -0.35534(7)  | 0.0492(3)     |
| Cl(5)  | -0.42506(12) | 0.73222(13) | -0.21739(9)  | 0.0513(3)     |
| Cl(6)  | -0.09793(12) | 0.55930(8)  | -0.18202(9)  | 0.0405(3)     |
| Cl(7)  | -0.36235(18) | 0.49597(11) | -0.27085(13) | 0.0702(5)     |
| C(5a)  | 0.8221(14)   | 0.3643(9)   | 0.5024(8)    | 0.050(3)      |
| C(5b)  | 0.6721(14)   | 0.4096(9)   | 0.5058(8)    | 0.052(3)      |
| Cl(8)  | 0.7095(2)    | 0.44892(15) | 0.39777(13)  | 0.0718(5)     |
| Cl(9)  | 0.7751(3)    | 0.2652(2)   | 0.55309(12)  | 0.1013(8)     |

<sup>a</sup>*U*(eq) is defined as one third of the trace of the orthogonalized  $\mathbf{U}_{ij}$  tensor. The estimated standard deviations of the least significant digits are given in parentheses.

**Table S3.** Bond Lengths for [Fe(TEtP<sup>•</sup>)(Cl)]SbCl<sub>6</sub><sup>a</sup>

| bond        | length (Å) | bond          | length (Å) |
|-------------|------------|---------------|------------|
| Fe(1)–N(3)  | 2.060(3)   | C(a8)–C(b8)   | 1.433(5)   |
| Fe(1)–N(4)  | 2.066(3)   | C(b1)–C(b2)   | 1.342(6)   |
| Fe(1)–N(2)  | 2.067(3)   | C(b3)–C(b4)   | 1.339(5)   |
| Fe(1)–N(1)  | 2.078(3)   | C(b5)–C(b6)   | 1.348(5)   |
| Fe(1)–Cl(1) | 2.1634(11) | C(b7)–C(b8)   | 1.348(7)   |
| N(1)–C(a2)  | 1.370(4)   | C(m1)–C(11a)  | 1.52(2)    |
| N(1)–C(a1)  | 1.381(4)   | C(m1)–C(11b)  | 1.523(19)  |
| N(2)–C(a4)  | 1.369(4)   | C(m2)–C(21)   | 1.510(5)   |
| N(2)–C(a3)  | 1.384(4)   | C(m3)–C(31)   | 1.513(4)   |
| N(3)–C(a6)  | 1.377(4)   | C(m4)–C(41)   | 1.517(5)   |
| N(3)–C(a5)  | 1.383(4)   | C(11a)–C(12a) | 1.554(14)  |
| N(4)–C(a8)  | 1.374(4)   | C(11b)–C(12b) | 1.529(14)  |
| N(4)–C(a7)  | 1.383(5)   | C(21)–C(22)   | 1.527(6)   |
| C(a1)–C(m1) | 1.390(5)   | C(31)–C(32)   | 1.526(5)   |
| C(a1)–C(b1) | 1.431(5)   | C(41)–C(42)   | 1.525(7)   |
| C(a2)–C(m2) | 1.403(5)   | Sb(1)–Cl(5)   | 2.3311(14) |
| C(a2)–C(b2) | 1.433(5)   | Sb(1)–Cl(2b)  | 2.346(3)   |
| C(a3)–C(m2) | 1.395(5)   | Sb(1)–Cl(7)   | 2.3490(13) |
| C(a3)–C(b3) | 1.446(5)   | Sb(1)–Cl(3)   | 2.3542(15) |
| C(a4)–C(m3) | 1.412(5)   | Sb(1)–Cl(4)   | 2.3719(12) |
| C(a4)–C(b4) | 1.440(4)   | Sb(1)–Cl(2a)  | 2.377(5)   |
| C(a5)–C(m3) | 1.395(4)   | Sb(1)–Cl(6)   | 2.3815(14) |
| C(a5)–C(b5) | 1.437(4)   | Cl(2a)–Cl(2b) | 0.686(4)   |
| C(a6)–C(m4) | 1.409(5)   | C(5a)–Cl(9)   | 1.571(10)  |
| C(a6)–C(b6) | 1.428(5)   | C(5a)–Cl(8)   | 1.846(12)  |
| C(a7)–C(m4) | 1.398(5)   | C(5b)–Cl(8)   | 1.602(11)  |
| C(a7)–C(b7) | 1.430(5)   | C(5b)–Cl(9)   | 1.884(12)  |
| C(a8)–C(m1) | 1.408(6)   |               |            |

<sup>a</sup>The estimated standard deviations of the least significant digits are given in parentheses.

**Table S4.** Bond Angles for [Fe(TEtP\*)(Cl)]SbCl<sub>6</sub><sup>a</sup>

| angle             | degree     | angle               | degree    |
|-------------------|------------|---------------------|-----------|
| N(3)–Fe(1)–N(4)   | 87.15(11)  | C(b5)–C(b6)–C(a6)   | 107.2(3)  |
| N(3)–Fe(1)–N(2)   | 87.20(11)  | C(b8)–C(b7)–C(a7)   | 107.3(4)  |
| N(4)–Fe(1)–N(2)   | 153.83(11) | C(b7)–C(b8)–C(a8)   | 107.1(3)  |
| N(3)–Fe(1)–N(1)   | 154.48(10) | C(a1)–C(m1)–C(a8)   | 124.0(3)  |
| N(4)–Fe(1)–N(1)   | 86.84(12)  | C(a1)–C(m1)–C(11a)  | 121.9(8)  |
| N(2)–Fe(1)–N(1)   | 87.34(11)  | C(a8)–C(m1)–C(11a)  | 113.6(8)  |
| N(3)–Fe(1)–Cl(1)  | 102.39(8)  | C(a1)–C(m1)–C(11b)  | 113.7(8)  |
| N(4)–Fe(1)–Cl(1)  | 104.44(9)  | C(a8)–C(m1)–C(11b)  | 121.7(8)  |
| N(2)–Fe(1)–Cl(1)  | 101.73(8)  | C(11a)–C(m1)–C(11b) | 17.7(6)   |
| N(1)–Fe(1)–Cl(1)  | 103.13(8)  | C(a3)–C(m2)–C(a2)   | 124.3(3)  |
| C(a2)–N(1)–C(a1)  | 106.0(3)   | C(a3)–C(m2)–C(21)   | 117.9(3)  |
| C(a2)–N(1)–Fe(1)  | 126.1(2)   | C(a2)–C(m2)–C(21)   | 117.7(3)  |
| C(a1)–N(1)–Fe(1)  | 125.6(2)   | C(a5)–C(m3)–C(a4)   | 123.9(3)  |
| C(a4)–N(2)–C(a3)  | 105.9(3)   | C(a5)–C(m3)–C(31)   | 117.9(3)  |
| C(a4)–N(2)–Fe(1)  | 125.9(2)   | C(a4)–C(m3)–C(31)   | 118.0(3)  |
| C(a3)–N(2)–Fe(1)  | 125.5(2)   | C(a7)–C(m4)–C(a6)   | 124.2(3)  |
| C(a6)–N(3)–C(a5)  | 105.2(3)   | C(a7)–C(m4)–C(41)   | 118.0(3)  |
| C(a6)–N(3)–Fe(1)  | 126.1(2)   | C(a6)–C(m4)–C(41)   | 117.7(3)  |
| C(a5)–N(3)–Fe(1)  | 126.0(2)   | C(m1)–C(11a)–C(12a) | 113.5(10) |
| C(a8)–N(4)–C(a7)  | 105.4(3)   | C(m1)–C(11b)–C(12b) | 113.3(11) |
| C(a8)–N(4)–Fe(1)  | 126.8(2)   | C(m2)–C(21)–C(22)   | 110.7(3)  |
| C(a7)–N(4)–Fe(1)  | 126.5(2)   | C(m3)–C(31)–C(32)   | 110.9(3)  |
| N(1)–C(a1)–C(m1)  | 125.8(3)   | C(m4)–C(41)–C(42)   | 110.4(4)  |
| N(1)–C(a1)–C(b1)  | 109.5(3)   | Cl(5)–Sb(1)–Cl(2b)  | 173.7(3)  |
| C(m1)–C(a1)–C(b1) | 124.7(3)   | Cl(5)–Sb(1)–Cl(7)   | 90.93(7)  |
| N(1)–C(a2)–C(m2)  | 125.8(3)   | Cl(2b)–Sb(1)–Cl(7)  | 85.6(3)   |
| N(1)–C(a2)–C(b2)  | 109.8(3)   | Cl(5)–Sb(1)–Cl(3)   | 91.44(6)  |
| C(m2)–C(a2)–C(b2) | 124.4(3)   | Cl(2b)–Sb(1)–Cl(3)  | 93.8(2)   |
| N(2)–C(a3)–C(m2)  | 126.2(3)   | Cl(7)–Sb(1)–Cl(3)   | 89.82(5)  |
| N(2)–C(a3)–C(b3)  | 109.5(3)   | Cl(5)–Sb(1)–Cl(4)   | 89.69(6)  |
| C(m2)–C(a3)–C(b3) | 124.3(3)   | Cl(2b)–Sb(1)–Cl(4)  | 93.7(3)   |
| N(2)–C(a4)–C(m3)  | 125.6(3)   | Cl(7)–Sb(1)–Cl(4)   | 178.98(5) |
| N(2)–C(a4)–C(b4)  | 110.0(3)   | Cl(3)–Sb(1)–Cl(4)   | 90.96(5)  |
| C(m3)–C(a4)–C(b4) | 124.4(3)   | Cl(5)–Sb(1)–Cl(2a)  | 169.0(3)  |

**Table S4.** Continued

| angle             | degree   | angle               | degree    |
|-------------------|----------|---------------------|-----------|
| N(3)–C(a5)–C(m3)  | 125.8(3) | Cl(2b)–Sb(1)–Cl(2a) | 16.68(11) |
| N(3)–C(a5)–C(b5)  | 110.0(3) | Cl(7)–Sb(1)–Cl(2a)  | 99.0(3)   |
| C(m3)–C(a5)–C(b5) | 124.2(3) | Cl(3)–Sb(1)–Cl(2a)  | 83.94(18) |
| N(3)–C(a6)–C(m4)  | 125.1(3) | Cl(4)–Sb(1)–Cl(2a)  | 80.4(3)   |
| N(3)–C(a6)–C(b6)  | 110.5(3) | Cl(5)–Sb(1)–Cl(6)   | 88.95(5)  |
| C(m4)–C(a6)–C(b6) | 124.3(3) | Cl(2b)–Sb(1)–Cl(6)  | 85.8(2)   |
| N(4)–C(a7)–C(m4)  | 125.5(3) | Cl(7)–Sb(1)–Cl(6)   | 90.44(5)  |
| N(4)–C(a7)–C(b7)  | 110.0(3) | Cl(3)–Sb(1)–Cl(6)   | 179.52(5) |
| C(m4)–C(a7)–C(b7) | 124.5(3) | Cl(4)–Sb(1)–Cl(6)   | 88.77(5)  |
| N(4)–C(a8)–C(m1)  | 125.7(3) | Cl(2a)–Sb(1)–Cl(6)  | 95.63(18) |
| N(4)–C(a8)–C(b8)  | 110.2(3) | Cl(2b)–Cl(2a)–Sb(1) | 79.1(5)   |
| C(m1)–C(a8)–C(b8) | 124.0(3) | Cl(2a)–Cl(2b)–Sb(1) | 84.3(6)   |
| C(b2)–C(b1)–C(a1) | 107.4(3) | Cl(9)–C(5a)–Cl(8)   | 114.7(7)  |
| C(b1)–C(b2)–C(a2) | 107.3(3) | Cl(8)–C(5b)–Cl(9)   | 111.3(6)  |
| C(b4)–C(b3)–C(a3) | 107.1(3) | C(5b)–Cl(8)–C(5a)   | 47.4(6)   |
| C(b3)–C(b4)–C(a4) | 107.5(3) | C(5a)–Cl(9)–C(5b)   | 46.9(6)   |
| C(b6)–C(b5)–C(a5) | 107.1(3) |                     |           |

<sup>a</sup>The estimated standard deviations of the least significant digits are given in parentheses.

**Table S5.** Anisotropic Displacement Parameters ( $\text{\AA}^2$ ) for  $[\text{Fe}(\text{TEtP}^*)(\text{Cl})]\text{SbCl}_6^a$ 

| atom   | $U_{11}$   | $U_{22}$   | $U_{33}$   | $U_{23}$    | $U_{13}$    | $U_{12}$    |
|--------|------------|------------|------------|-------------|-------------|-------------|
| Fe(1)  | 0.0121(2)  | 0.0168(2)  | 0.0111(2)  | -0.0035(2)  | 0.0006(2)   | -0.0057(2)  |
| Cl(1)  | 0.0126(3)  | 0.0370(5)  | 0.0339(5)  | -0.0157(4)  | 0.0005(3)   | -0.0048(3)  |
| N(1)   | 0.0156(12) | 0.0223(13) | 0.0132(12) | -0.0069(10) | -0.0002(9)  | -0.0062(10) |
| N(2)   | 0.0134(11) | 0.0165(12) | 0.0143(12) | -0.0028(9)  | 0.0007(9)   | -0.0071(9)  |
| N(3)   | 0.0128(11) | 0.0152(12) | 0.0151(12) | -0.0047(9)  | 0.0023(9)   | -0.0067(9)  |
| N(4)   | 0.0191(13) | 0.0228(14) | 0.0136(12) | -0.0012(10) | 0.0005(10)  | -0.0070(11) |
| C(a1)  | 0.0196(15) | 0.0302(18) | 0.0143(14) | -0.0078(13) | -0.0013(11) | -0.0064(13) |
| C(a2)  | 0.0189(15) | 0.0255(16) | 0.0207(15) | -0.0089(13) | -0.0010(12) | -0.0097(13) |
| C(a3)  | 0.0147(13) | 0.0173(14) | 0.0199(15) | -0.0015(12) | -0.0006(11) | -0.0055(11) |
| C(a4)  | 0.0143(13) | 0.0217(15) | 0.0101(12) | -0.0042(11) | 0.0025(10)  | -0.0062(11) |
| C(a5)  | 0.0125(13) | 0.0195(14) | 0.0159(14) | -0.0069(11) | 0.0010(10)  | -0.0057(11) |
| C(a6)  | 0.0160(14) | 0.0163(14) | 0.0221(15) | -0.0048(12) | 0.0018(11)  | -0.0059(11) |
| C(a7)  | 0.0295(18) | 0.0211(16) | 0.0220(16) | -0.0030(13) | 0.0036(13)  | -0.0131(14) |
| C(a8)  | 0.0253(17) | 0.0345(19) | 0.0134(14) | -0.0018(13) | 0.0002(12)  | -0.0128(14) |
| C(b1)  | 0.037(2)   | 0.034(2)   | 0.0192(16) | -0.0126(15) | -0.0033(15) | -0.0071(16) |
| C(b2)  | 0.038(2)   | 0.0278(19) | 0.0269(18) | -0.0123(15) | -0.0022(16) | -0.0106(16) |
| C(b3)  | 0.0242(16) | 0.0239(17) | 0.0203(16) | 0.0017(13)  | -0.0012(13) | -0.0082(13) |
| C(b4)  | 0.0277(17) | 0.0226(16) | 0.0159(14) | -0.0001(12) | 0.0003(12)  | -0.0122(13) |
| C(b5)  | 0.0184(14) | 0.0246(16) | 0.0200(15) | -0.0116(13) | 0.0009(12)  | -0.0083(12) |
| C(b6)  | 0.0200(15) | 0.0190(15) | 0.0290(17) | -0.0089(13) | 0.0005(13)  | -0.0079(12) |
| C(b7)  | 0.057(3)   | 0.035(2)   | 0.0232(19) | 0.0035(16)  | 0.0038(18)  | -0.024(2)   |
| C(b8)  | 0.053(3)   | 0.039(2)   | 0.0160(16) | 0.0033(15)  | 0.0030(16)  | -0.020(2)   |
| C(m1)  | 0.0229(16) | 0.0336(19) | 0.0142(14) | -0.0065(13) | -0.0007(12) | -0.0061(14) |
| C(m2)  | 0.0173(14) | 0.0178(14) | 0.0242(16) | -0.0041(12) | -0.0023(12) | -0.0084(12) |
| C(m3)  | 0.0150(13) | 0.0220(15) | 0.0119(13) | -0.0049(11) | 0.0017(10)  | -0.0050(11) |
| C(m4)  | 0.0217(16) | 0.0202(15) | 0.0248(17) | -0.0033(13) | 0.0024(13)  | -0.0077(13) |
| C(11a) | 0.033(8)   | 0.040(3)   | 0.0129(18) | -0.0071(19) | -0.002(5)   | -0.010(6)   |
| C(12a) | 0.033(4)   | 0.042(4)   | 0.027(4)   | -0.015(3)   | 0.013(3)    | -0.023(3)   |
| C(11b) | 0.033(8)   | 0.040(3)   | 0.0129(18) | -0.0071(19) | -0.002(5)   | -0.010(6)   |
| C(12b) | 0.039(4)   | 0.044(5)   | 0.015(3)   | -0.005(3)   | -0.001(3)   | -0.017(4)   |
| C(21)  | 0.0274(17) | 0.0198(16) | 0.0294(18) | -0.0070(13) | -0.0013(14) | -0.0093(13) |
| C(22)  | 0.035(2)   | 0.0205(18) | 0.053(3)   | -0.0107(17) | -0.0048(19) | -0.0013(16) |
| C(31)  | 0.0289(17) | 0.0298(18) | 0.0114(14) | -0.0049(12) | 0.0019(12)  | -0.0130(14) |
| C(32)  | 0.037(2)   | 0.053(3)   | 0.0192(17) | -0.0050(17) | -0.0083(15) | -0.0169(19) |

**Table S5.** Continued

| atom   | $U_{11}$   | $U_{22}$   | $U_{33}$   | $U_{23}$    | $U_{13}$    | $U_{12}$    |
|--------|------------|------------|------------|-------------|-------------|-------------|
| C(41)  | 0.046(2)   | 0.0217(18) | 0.033(2)   | -0.0025(15) | 0.0057(17)  | -0.0182(17) |
| C(42)  | 0.053(3)   | 0.047(3)   | 0.075(4)   | -0.019(3)   | 0.020(3)    | -0.037(3)   |
| Sb(1)  | 0.0283(1)  | 0.0253(1)  | 0.0222(1)  | -0.0082(1)  | 0.0028(1)   | -0.0155(1)  |
| Cl(2a) | 0.055(2)   | 0.034(4)   | 0.037(3)   | -0.020(3)   | 0.0190(16)  | -0.0208(18) |
| Cl(2b) | 0.0687(16) | 0.075(5)   | 0.075(4)   | -0.059(4)   | 0.0317(16)  | -0.0299(17) |
| Cl(3)  | 0.0755(9)  | 0.0761(9)  | 0.0274(5)  | 0.0073(5)   | -0.0175(5)  | -0.0555(8)  |
| Cl(4)  | 0.0818(9)  | 0.0620(7)  | 0.0238(5)  | 0.0043(5)   | -0.0093(5)  | -0.0588(7)  |
| Cl(5)  | 0.0282(5)  | 0.0797(9)  | 0.0445(6)  | -0.0329(6)  | 0.0022(4)   | -0.0015(5)  |
| Cl(6)  | 0.0334(5)  | 0.0295(5)  | 0.0548(7)  | 0.0040(4)   | -0.0164(5)  | -0.0115(4)  |
| Cl(7)  | 0.0742(10) | 0.0443(7)  | 0.0964(12) | 0.0219(7)   | -0.0423(9)  | -0.0447(7)  |
| C(5a)  | 0.067(8)   | 0.042(6)   | 0.050(6)   | -0.002(5)   | 0.004(5)    | -0.036(5)   |
| C(5b)  | 0.073(8)   | 0.051(6)   | 0.048(6)   | -0.023(5)   | 0.011(5)    | -0.036(6)   |
| Cl(8)  | 0.0916(13) | 0.0636(10) | 0.0631(9)  | -0.0134(8)  | -0.0095(9)  | -0.0273(9)  |
| Cl(9)  | 0.173(2)   | 0.1059(16) | 0.0367(8)  | 0.0016(9)   | -0.0313(11) | -0.0681(16) |

<sup>a</sup>The estimated standard deviations of the least significant digits are given in parentheses. The anisotropic displacement factor exponent takes the form:  $-2 \pi [h^2 a^{*2} U_{11} + \dots + 2 h k a^* b^* U_{12}]$ .



**Table S6.** Hydrogen Atom Coordinates and Equivalent Isotropic Displacement Parameters ( $\text{\AA}^2$ ) for  $[\text{Fe}(\text{TEtP}^*)(\text{Cl})]\text{SbCl}_6^a$

| atom   | $x$     | $y$     | $z$     | $U(\text{eq})$ |
|--------|---------|---------|---------|----------------|
| H(b1)  | -0.2168 | 0.2057  | 0.3661  | 0.036          |
| H(b2)  | -0.1825 | 0.3320  | 0.2221  | 0.036          |
| H(b3)  | -0.1445 | 0.3340  | -0.1443 | 0.028          |
| H(b4)  | -0.1431 | 0.2052  | -0.2401 | 0.026          |
| H(b5)  | -0.1673 | -0.1904 | -0.1657 | 0.023          |
| H(b6)  | -0.2015 | -0.3169 | -0.0209 | 0.026          |
| H(b7)  | -0.2146 | -0.3236 | 0.3456  | 0.045          |
| H(b8)  | -0.2183 | -0.1936 | 0.4415  | 0.043          |
| H(11a) | -0.2516 | 0.0703  | 0.4573  | 0.034          |
| H(11b) | -0.2030 | -0.0567 | 0.4809  | 0.034          |
| H(12a) | -0.4887 | 0.0693  | 0.4088  | 0.046          |
| H(12b) | -0.4528 | 0.0243  | 0.5198  | 0.046          |
| H(12c) | -0.4371 | -0.0562 | 0.4519  | 0.046          |
| H(11c) | -0.2707 | -0.0359 | 0.4780  | 0.034          |
| H(11d) | -0.2785 | 0.0865  | 0.4476  | 0.034          |
| H(12d) | -0.0126 | -0.0843 | 0.4748  | 0.048          |
| H(12e) | -0.0771 | -0.0149 | 0.5515  | 0.048          |
| H(12f) | -0.0255 | 0.0392  | 0.4520  | 0.048          |
| H(2a)  | -0.1088 | 0.3886  | -0.0261 | 0.030          |
| H(2b)  | -0.1197 | 0.3881  | 0.0846  | 0.030          |
| H(2c)  | -0.3683 | 0.4345  | -0.0342 | 0.056          |
| H(2d)  | -0.3161 | 0.5250  | -0.0068 | 0.056          |
| H(2e)  | -0.3719 | 0.4454  | 0.0735  | 0.056          |
| H(3a)  | -0.1141 | -0.0623 | -0.2529 | 0.027          |
| H(3b)  | -0.1094 | 0.0577  | -0.2757 | 0.027          |
| H(3c)  | -0.3698 | 0.0008  | -0.2513 | 0.054          |
| H(3d)  | -0.3146 | 0.0509  | -0.3512 | 0.054          |
| H(3e)  | -0.3655 | 0.1207  | -0.2733 | 0.054          |
| H(4a)  | -0.2024 | -0.3951 | 0.2315  | 0.039          |
| H(4b)  | -0.1961 | -0.3931 | 0.1205  | 0.039          |
| H(4c)  | -0.4504 | -0.3035 | 0.2178  | 0.079          |
| H(4d)  | -0.4222 | -0.4046 | 0.1721  | 0.079          |
| H(4e)  | -0.4472 | -0.2889 | 0.1052  | 0.079          |
| H(5a)  | 0.9231  | 0.3389  | 0.4826  | 0.059          |

**Table S6.** Continued

| atom  | $x$    | $y$    | $z$    | $U(\text{eq})$ |
|-------|--------|--------|--------|----------------|
| H(5b) | 0.8197 | 0.4083 | 0.5486 | 0.059          |
| H(5c) | 0.5674 | 0.4196 | 0.5104 | 0.062          |
| H(5d) | 0.6964 | 0.4532 | 0.5448 | 0.062          |

<sup>a</sup> $U(\text{eq})$  is defined as one third of the trace of the orthogonalized  $\mathbf{U}_{ij}$  tensor. The estimated standard deviations of the least significant digits are given in parentheses.

**Table S7.** Complete Crystallographic Details for [Fe(TPrP\*)(Cl)]SbCl<sub>6</sub>

|                                                              |                                                                                                     |
|--------------------------------------------------------------|-----------------------------------------------------------------------------------------------------|
| formula                                                      | C <sub>32</sub> H <sub>36</sub> Cl <sub>7</sub> FeN <sub>4</sub> Sb·CH <sub>2</sub> Cl <sub>2</sub> |
| FW, amu                                                      | 987.32                                                                                              |
| <i>a</i> , Å                                                 | 10.0407(1)                                                                                          |
| <i>b</i> , Å                                                 | 14.4882(6)                                                                                          |
| <i>c</i> , Å                                                 | 15.7601(9)                                                                                          |
| $\alpha$ , deg                                               | 111.079(5)                                                                                          |
| $\beta$ , deg                                                | 103.848(7)                                                                                          |
| $\gamma$ , deg                                               | 101.504(5)                                                                                          |
| <i>V</i> , Å <sup>3</sup>                                    | 1971.21(14)                                                                                         |
| space group                                                  | <i>P</i> $\bar{1}$                                                                                  |
| <i>Z</i>                                                     | 2                                                                                                   |
| D <sub>c</sub> , g/cm <sup>3</sup>                           | 1.663                                                                                               |
| F(000)                                                       | 988                                                                                                 |
| $\mu$ , mm <sup>-1</sup>                                     | 1.694                                                                                               |
| power and current settings                                   | 50kV, 30mA                                                                                          |
| detector distance, mm                                        | 40                                                                                                  |
| detector tilt angle, deg                                     | -25                                                                                                 |
| image time, sec                                              | 10                                                                                                  |
| increment, deg                                               | 0.20                                                                                                |
| crystal dimensions, mm                                       | 0.37 × 0.23 × 0.20                                                                                  |
| radiation                                                    | MoK $\alpha$ , $\bar{\lambda}$ = 0.71073 Å                                                          |
| temperature, K                                               | 130(2)                                                                                              |
| diffractometer                                               | Enraf Nonius FAST                                                                                   |
| $\theta$ range for collected data, deg                       | 2.19–29.82                                                                                          |
| index range                                                  | -13 ≤ <i>h</i> ≤ 10<br>-19 ≤ <i>k</i> ≤ 19<br>-15 ≤ <i>l</i> ≤ 21                                   |
| total data collected                                         | 19282                                                                                               |
| absorption correction                                        | DIFABS                                                                                              |
| relative transmission coefficients (I)                       | 1.0000 and 0.7870                                                                                   |
| unique data                                                  | 9979 ( <i>R</i> <sub>int</sub> = 0.0701)                                                            |
| unique observed data [ <i>I</i> > 2 $\sigma$ ( <i>I</i> )]   | 8908                                                                                                |
| refinement method                                            | Full-matrix least-sq                                                                                |
| data/restraints/parameters                                   | 9979 / 0 / 452                                                                                      |
| goodness-of-fit (based on <i>F</i> <sup>2</sup> )            | 1.078                                                                                               |
| max( $\Delta\rho$ ), e/Å <sup>3</sup>                        | 1.726                                                                                               |
| min( $\Delta\rho$ ), e/Å <sup>3</sup>                        | -1.778                                                                                              |
| final <i>R</i> indices [ <i>I</i> > 2 $\sigma$ ( <i>I</i> )] | <i>R</i> <sub>1</sub> = 0.0497, <i>wR</i> <sub>2</sub> = 0.1227                                     |
| final <i>R</i> indices (all data)                            | <i>R</i> <sub>1</sub> = 0.0571, <i>wR</i> <sub>2</sub> = 0.1338                                     |

**Table S8.** Atomic Coordinates and Equivalent Isotropic Displacement Parameters ( $\text{\AA}^2$ ) for  $[\text{Fe}(\text{TPrP}^*)(\text{Cl})]\text{SbCl}_6^a$

| atom   | $x$        | $y$          | $z$          | $U(\text{eq})$ |
|--------|------------|--------------|--------------|----------------|
| Fe(1)  | 0.23787(4) | 0.02952(3)   | 0.06908(2)   | 0.0103(1)      |
| Cl(1)  | 0.47041(7) | 0.09086(6)   | 0.10837(5)   | 0.0212(2)      |
| N(1)   | 0.1618(2)  | 0.10457(17)  | -0.01262(15) | 0.0125(4)      |
| N(2)   | 0.1787(2)  | -0.10056(17) | -0.05956(16) | 0.0134(4)      |
| N(3)   | 0.2116(2)  | -0.07114(17) | 0.13374(16)  | 0.0146(4)      |
| N(4)   | 0.1985(2)  | 0.13490(17)  | 0.18165(15)  | 0.0124(4)      |
| C(m1)  | 0.1719(3)  | 0.2668(2)    | 0.11903(19)  | 0.0155(5)      |
| C(m2)  | 0.1466(3)  | -0.0189(2)   | -0.17372(18) | 0.0147(5)      |
| C(m3)  | 0.2072(3)  | -0.2318(2)   | 0.0035(2)    | 0.0203(5)      |
| C(m4)  | 0.2264(3)  | 0.0524(2)    | 0.29454(19)  | 0.0162(5)      |
| C(a1)  | 0.1584(3)  | 0.2051(2)    | 0.02317(19)  | 0.0145(5)      |
| C(a2)  | 0.1476(3)  | 0.0767(2)    | -0.10887(18) | 0.0136(4)      |
| C(a3)  | 0.1609(3)  | -0.1020(2)   | -0.14869(18) | 0.0148(5)      |
| C(a4)  | 0.1919(3)  | -0.1969(2)   | -0.0689(2)   | 0.0176(5)      |
| C(a5)  | 0.2127(3)  | -0.1722(2)   | 0.0979(2)    | 0.0188(5)      |
| C(a6)  | 0.2189(3)  | -0.0446(2)   | 0.2285(2)    | 0.0166(5)      |
| C(a7)  | 0.2205(3)  | 0.1370(2)    | 0.27171(18)  | 0.0151(5)      |
| C(a8)  | 0.1927(3)  | 0.2326(2)    | 0.19257(18)  | 0.0137(4)      |
| C(b1)  | 0.1427(3)  | 0.2417(2)    | -0.0512(2)   | 0.0200(5)      |
| C(b2)  | 0.1354(3)  | 0.1624(2)    | -0.1324(2)   | 0.0190(5)      |
| C(b3)  | 0.1607(3)  | -0.2001(2)   | -0.21541(19) | 0.0196(5)      |
| C(b4)  | 0.1819(3)  | -0.2580(2)   | -0.1661(2)   | 0.0219(6)      |
| C(b5)  | 0.2194(3)  | -0.2094(2)   | 0.1710(2)    | 0.0232(6)      |
| C(b6)  | 0.2222(3)  | -0.1323(2)   | 0.2508(2)    | 0.0227(6)      |
| C(b7)  | 0.2318(3)  | 0.2378(2)    | 0.33990(19)  | 0.0191(5)      |
| C(b8)  | 0.2127(3)  | 0.2966(2)    | 0.2910(2)    | 0.0189(5)      |
| C(11)  | 0.1714(3)  | 0.3773(2)    | 0.1461(2)    | 0.0186(5)      |
| C(12)  | 0.3237(3)  | 0.4535(2)    | 0.1837(2)    | 0.0236(6)      |
| C(13)  | 0.3207(4)  | 0.5645(3)    | 0.2086(3)    | 0.0321(7)      |
| C(21)  | 0.1330(3)  | -0.0366(2)   | -0.27652(19) | 0.0188(5)      |
| C(22)  | 0.2777(3)  | -0.0296(3)   | -0.2953(2)   | 0.0268(6)      |
| C(23)  | 0.3915(4)  | 0.0757(3)    | -0.2328(3)   | 0.0339(8)      |
| C(31)  | 0.2218(5)  | -0.3393(2)   | -0.0194(3)   | 0.0342(8)      |
| C(32a) | 0.3592(11) | -0.3467(8)   | 0.0171(9)    | 0.0257(14)     |

**Table S8.** Continued

| atom   | $x$         | $y$         | $z$        | $U(\text{eq})$ |
|--------|-------------|-------------|------------|----------------|
| C(33a) | 0.4546(8)   | -0.3119(7)  | -0.0353(6) | 0.0392(19)     |
| C(32b) | 0.3993(12)  | -0.3265(9)  | 0.0095(9)  | 0.0257(14)     |
| C(33b) | 0.4256(9)   | -0.4311(6)  | -0.0100(6) | 0.0357(19)     |
| C(41)  | 0.2468(3)   | 0.0698(2)   | 0.3977(2)  | 0.0203(5)      |
| C(42)  | 0.4070(3)   | 0.1088(3)   | 0.4593(2)  | 0.0231(6)      |
| C(43)  | 0.4262(4)   | 0.1314(4)   | 0.5636(2)  | 0.0361(8)      |
| Sb(1)  | 0.95613(2)  | 0.66319(1)  | 0.36357(1) | 0.0177(1)      |
| Cl(2)  | 0.70589(10) | 0.58033(11) | 0.30939(9) | 0.0532(3)      |
| Cl(3)  | 0.91839(12) | 0.82530(8)  | 0.38609(8) | 0.0429(2)      |
| Cl(4)  | 0.96877(11) | 0.69160(7)  | 0.52256(6) | 0.0361(2)      |
| Cl(5)  | 0.94337(11) | 0.62697(8)  | 0.20241(6) | 0.0377(2)      |
| Cl(6)  | 0.99945(10) | 0.50329(6)  | 0.34263(6) | 0.0324(2)      |
| Cl(7)  | 1.20642(8)  | 0.74833(6)  | 0.42024(6) | 0.0291(2)      |
| Cl(8)  | 1.42263(11) | 0.58968(7)  | 0.46924(6) | 0.0380(2)      |
| Cl(9)  | 1.40350(11) | 0.69185(8)  | 0.66159(7) | 0.0444(2)      |
| C(1)   | 1.3278(5)   | 0.5834(3)   | 0.5492(3)  | 0.0409(9)      |

<sup>a</sup> $U(\text{eq})$  is defined as one third of the trace of the orthogonalized  $\mathbf{U}_{ij}$  tensor. The estimated standard deviations of the least significant digits are given in parentheses.

**Table S9.** Bond Lengths for [Fe(TPrP<sup>•</sup>)(Cl)]SbCl<sub>6</sub><sup>a</sup>

| bond        | length (Å) | bond          | length (Å) |
|-------------|------------|---------------|------------|
| Fe(1)–N(2)  | 2.060(2)   | C(a4)–C(b4)   | 1.434(4)   |
| Fe(1)–N(4)  | 2.064(2)   | C(a5)–C(b5)   | 1.432(4)   |
| Fe(1)–N(3)  | 2.069(2)   | C(a6)–C(b6)   | 1.438(4)   |
| Fe(1)–N(1)  | 2.071(2)   | C(a7)–C(b7)   | 1.430(4)   |
| Fe(1)–Cl(1) | 2.1700(7)  | C(a8)–C(b8)   | 1.431(4)   |
| N(1)–C(a1)  | 1.370(3)   | C(b1)–C(b2)   | 1.351(4)   |
| N(1)–C(a2)  | 1.385(3)   | C(b3)–C(b4)   | 1.347(4)   |
| N(2)–C(a3)  | 1.365(3)   | C(b5)–C(b6)   | 1.337(5)   |
| N(2)–C(a4)  | 1.386(3)   | C(b7)–C(b8)   | 1.351(4)   |
| N(3)–C(a5)  | 1.370(3)   | C(11)–C(12)   | 1.526(4)   |
| N(3)–C(a6)  | 1.382(3)   | C(12)–C(13)   | 1.521(4)   |
| N(4)–C(a7)  | 1.371(3)   | C(21)–C(22)   | 1.542(4)   |
| N(4)–C(a8)  | 1.378(3)   | C(22)–C(23)   | 1.512(5)   |
| C(m1)–C(a8) | 1.403(4)   | C(31)–C(32a)  | 1.402(11)  |
| C(m1)–C(a1) | 1.408(4)   | C(31)–C(32b)  | 1.684(12)  |
| C(m1)–C(11) | 1.504(4)   | C(32a)–C(33a) | 1.529(12)  |
| C(m2)–C(a2) | 1.391(4)   | C(32b)–C(33b) | 1.525(13)  |
| C(m2)–C(a3) | 1.417(4)   | C(41)–C(42)   | 1.531(4)   |
| C(m2)–C(21) | 1.513(4)   | C(42)–C(43)   | 1.511(4)   |
| C(m3)–C(a4) | 1.394(4)   | Sb(1)–Cl(2)   | 2.3486(9)  |
| C(m3)–C(a5) | 1.407(4)   | Sb(1)–Cl(7)   | 2.3519(8)  |
| C(m3)–C(31) | 1.513(4)   | Sb(1)–Cl(4)   | 2.3557(8)  |
| C(m4)–C(a6) | 1.390(4)   | Sb(1)–Cl(6)   | 2.3634(8)  |
| C(m4)–C(a7) | 1.404(4)   | Sb(1)–Cl(5)   | 2.3668(8)  |
| C(m4)–C(41) | 1.508(4)   | Sb(1)–Cl(3)   | 2.3677(9)  |
| C(a1)–C(b1) | 1.440(4)   | Cl(8)–C(1)    | 1.768(4)   |
| C(a2)–C(b2) | 1.436(4)   | Cl(9)–C(1)    | 1.749(4)   |
| C(a3)–C(b3) | 1.432(4)   |               |            |

<sup>a</sup>The estimated standard deviations of the least significant digits are given in parentheses.

**Table S10.** Bond Angles for [Fe(TPrP<sup>•</sup>)(Cl)]SbCl<sub>6</sub><sup>a</sup>

| angle             | degree     | angle               | degree    |
|-------------------|------------|---------------------|-----------|
| N(2)–Fe(1)–N(4)   | 154.26(9)  | N(3)–C(a5)–C(b5)    | 109.7(3)  |
| N(2)–Fe(1)–N(3)   | 87.15(9)   | C(m3)–C(a5)–C(b5)   | 124.4(3)  |
| N(4)–Fe(1)–N(3)   | 86.91(9)   | N(3)–C(a6)–C(m4)    | 126.0(2)  |
| N(2)–Fe(1)–N(1)   | 87.00(9)   | N(3)–C(a6)–C(b6)    | 109.7(2)  |
| N(4)–Fe(1)–N(1)   | 87.16(8)   | C(m4)–C(a6)–C(b6)   | 124.3(3)  |
| N(3)–Fe(1)–N(1)   | 153.35(9)  | N(4)–C(a7)–C(m4)    | 125.7(2)  |
| N(2)–Fe(1)–Cl(1)  | 103.53(7)  | N(4)–C(a7)–C(b7)    | 110.2(2)  |
| N(4)–Fe(1)–Cl(1)  | 102.21(6)  | C(m4)–C(a7)–C(b7)   | 124.1(2)  |
| N(3)–Fe(1)–Cl(1)  | 104.01(7)  | N(4)–C(a8)–C(m1)    | 125.7(2)  |
| N(1)–Fe(1)–Cl(1)  | 102.64(6)  | N(4)–C(a8)–C(b8)    | 110.4(2)  |
| C(a1)–N(1)–C(a2)  | 105.8(2)   | C(m1)–C(a8)–C(b8)   | 123.8(2)  |
| C(a1)–N(1)–Fe(1)  | 125.75(17) | C(b2)–C(b1)–C(a1)   | 106.8(2)  |
| C(a2)–N(1)–Fe(1)  | 125.79(17) | C(b1)–C(b2)–C(a2)   | 107.4(2)  |
| C(a3)–N(2)–C(a4)  | 105.5(2)   | C(b4)–C(b3)–C(a3)   | 107.2(2)  |
| C(a3)–N(2)–Fe(1)  | 126.42(18) | C(b3)–C(b4)–C(a4)   | 107.0(2)  |
| C(a4)–N(2)–Fe(1)  | 125.54(17) | C(b6)–C(b5)–C(a5)   | 107.9(3)  |
| C(a5)–N(3)–C(a6)  | 105.8(2)   | C(b5)–C(b6)–C(a6)   | 106.9(3)  |
| C(a5)–N(3)–Fe(1)  | 126.44(19) | C(b8)–C(b7)–C(a7)   | 107.4(2)  |
| C(a6)–N(3)–Fe(1)  | 126.60(18) | C(b7)–C(b8)–C(a8)   | 106.6(2)  |
| C(a7)–N(4)–C(a8)  | 105.4(2)   | C(m1)–C(11)–C(12)   | 112.0(2)  |
| C(a7)–N(4)–Fe(1)  | 125.77(17) | C(13)–C(12)–C(11)   | 111.2(3)  |
| C(a8)–N(4)–Fe(1)  | 125.75(17) | C(m2)–C(21)–C(22)   | 113.2(2)  |
| C(a8)–C(m1)–C(a1) | 123.7(2)   | C(23)–C(22)–C(21)   | 113.3(3)  |
| C(a8)–C(m1)–C(11) | 117.6(2)   | C(32a)–C(31)–C(m3)  | 118.1(5)  |
| C(a1)–C(m1)–C(11) | 118.6(2)   | C(32a)–C(31)–C(32b) | 16.0(5)   |
| C(a2)–C(m2)–C(a3) | 123.6(2)   | C(m3)–C(31)–C(32b)  | 107.7(4)  |
| C(a2)–C(m2)–C(21) | 119.5(2)   | C(31)–C(32a)–C(33a) | 108.5(7)  |
| C(a3)–C(m2)–C(21) | 116.9(2)   | C(33b)–C(32b)–C(31) | 111.7(7)  |
| C(a4)–C(m3)–C(a5) | 123.8(3)   | C(m4)–C(41)–C(42)   | 111.7(2)  |
| C(a4)–C(m3)–C(31) | 118.6(3)   | C(43)–C(42)–C(41)   | 111.2(3)  |
| C(a5)–C(m3)–C(31) | 117.5(3)   | Cl(2)–Sb(1)–Cl(7)   | 179.00(4) |
| C(a6)–C(m4)–C(a7) | 123.8(2)   | Cl(2)–Sb(1)–Cl(4)   | 89.74(4)  |
| C(a6)–C(m4)–C(41) | 118.6(2)   | Cl(7)–Sb(1)–Cl(4)   | 89.49(3)  |
| C(a7)–C(m4)–C(41) | 117.6(3)   | Cl(2)–Sb(1)–Cl(6)   | 90.52(4)  |

**Table S10.** Continued

| angle             | degree   | angle             | degree    |
|-------------------|----------|-------------------|-----------|
| N(1)–C(a1)–C(m1)  | 126.1(2) | Cl(7)–Sb(1)–Cl(6) | 90.09(3)  |
| N(1)–C(a1)–C(b1)  | 110.3(2) | Cl(4)–Sb(1)–Cl(6) | 88.12(3)  |
| C(m1)–C(a1)–C(b1) | 123.6(2) | Cl(2)–Sb(1)–Cl(5) | 89.84(4)  |
| N(1)–C(a2)–C(m2)  | 125.9(2) | Cl(7)–Sb(1)–Cl(5) | 90.95(3)  |
| N(1)–C(a2)–C(b2)  | 109.7(2) | Cl(4)–Sb(1)–Cl(5) | 177.46(3) |
| C(m2)–C(a2)–C(b2) | 124.5(2) | Cl(6)–Sb(1)–Cl(5) | 89.38(3)  |
| N(2)–C(a3)–C(m2)  | 126.0(2) | Cl(2)–Sb(1)–Cl(3) | 90.76(4)  |
| N(2)–C(a3)–C(b3)  | 110.5(2) | Cl(7)–Sb(1)–Cl(3) | 88.63(3)  |
| C(m2)–C(a3)–C(b3) | 123.5(2) | Cl(4)–Sb(1)–Cl(3) | 91.78(4)  |
| N(2)–C(a4)–C(m3)  | 125.8(2) | Cl(6)–Sb(1)–Cl(3) | 178.72(4) |
| N(2)–C(a4)–C(b4)  | 109.8(2) | Cl(5)–Sb(1)–Cl(3) | 90.73(4)  |
| C(m3)–C(a4)–C(b4) | 124.4(3) | Cl(9)–C(1)–Cl(8)  | 112.8(2)  |
| N(3)–C(a5)–C(m3)  | 125.9(3) |                   |           |

<sup>a</sup>The estimated standard deviations of the least significant digits are given in parentheses.



**Table S11.** Anisotropic Displacement Parameters ( $\text{\AA}^2$ ) for  $[\text{Fe}(\text{TPrP}^*)(\text{Cl})]\text{SbCl}_6^a$ 

| atom   | $U_{11}$   | $U_{22}$   | $U_{33}$   | $U_{23}$   | $U_{13}$   | $U_{12}$   |
|--------|------------|------------|------------|------------|------------|------------|
| Fe(1)  | 0.0100(2)  | 0.0095(2)  | 0.0114(2)  | 0.0049(1)  | 0.0031(1)  | 0.0032(1)  |
| Cl(1)  | 0.0105(3)  | 0.0235(3)  | 0.0232(3)  | 0.0059(3)  | 0.0040(2)  | 0.0022(2)  |
| N(1)   | 0.0132(9)  | 0.0132(10) | 0.0131(9)  | 0.0070(8)  | 0.0045(7)  | 0.0053(8)  |
| N(2)   | 0.0115(9)  | 0.0124(10) | 0.0143(9)  | 0.0052(8)  | 0.0029(7)  | 0.0026(8)  |
| N(3)   | 0.0150(10) | 0.0129(10) | 0.0173(10) | 0.0079(8)  | 0.0049(8)  | 0.0053(8)  |
| N(4)   | 0.0125(9)  | 0.0141(10) | 0.0123(9)  | 0.0057(8)  | 0.0049(7)  | 0.0063(8)  |
| C(m1)  | 0.0148(11) | 0.0151(11) | 0.0168(11) | 0.0067(9)  | 0.0037(9)  | 0.0071(9)  |
| C(m2)  | 0.0110(10) | 0.0175(12) | 0.0143(11) | 0.0063(9)  | 0.0033(9)  | 0.0037(9)  |
| C(m3)  | 0.0220(13) | 0.0126(12) | 0.0245(13) | 0.0086(10) | 0.0046(10) | 0.0047(10) |
| C(m4)  | 0.0111(11) | 0.0252(13) | 0.0172(11) | 0.0136(10) | 0.0058(9)  | 0.0060(10) |
| C(a1)  | 0.0147(11) | 0.0141(11) | 0.0166(11) | 0.0075(9)  | 0.0058(9)  | 0.0058(9)  |
| C(a2)  | 0.0111(10) | 0.0180(12) | 0.0144(11) | 0.0095(9)  | 0.0048(9)  | 0.0046(9)  |
| C(a3)  | 0.0101(10) | 0.0155(11) | 0.0134(10) | 0.0028(9)  | 0.0014(8)  | 0.0026(9)  |
| C(a4)  | 0.0161(12) | 0.0116(11) | 0.0189(12) | 0.0035(9)  | 0.0021(9)  | 0.0024(9)  |
| C(a5)  | 0.0188(12) | 0.0145(12) | 0.0249(13) | 0.0114(10) | 0.0057(10) | 0.0053(10) |
| C(a6)  | 0.0142(11) | 0.0189(12) | 0.0208(12) | 0.0143(10) | 0.0050(9)  | 0.0041(9)  |
| C(a7)  | 0.0139(11) | 0.0195(12) | 0.0135(11) | 0.0085(9)  | 0.0050(9)  | 0.0052(9)  |
| C(a8)  | 0.0124(11) | 0.0145(11) | 0.0150(11) | 0.0062(9)  | 0.0050(9)  | 0.0057(9)  |
| C(b1)  | 0.0269(14) | 0.0175(12) | 0.0209(12) | 0.0131(11) | 0.0069(11) | 0.0103(11) |
| C(b2)  | 0.0233(13) | 0.0199(12) | 0.0161(11) | 0.0108(10) | 0.0058(10) | 0.0068(10) |
| C(b3)  | 0.0195(12) | 0.0157(12) | 0.0143(11) | -0.0006(9) | 0.0027(9)  | 0.0034(10) |
| C(b4)  | 0.0214(13) | 0.0138(12) | 0.0220(13) | 0.0012(10) | 0.0029(10) | 0.0056(10) |
| C(b5)  | 0.0236(14) | 0.0217(13) | 0.0324(15) | 0.0198(12) | 0.0088(12) | 0.0091(11) |
| C(b6)  | 0.0225(13) | 0.0276(15) | 0.0279(14) | 0.0216(12) | 0.0086(11) | 0.0097(11) |
| C(b7)  | 0.0211(13) | 0.0233(13) | 0.0141(11) | 0.0065(10) | 0.0081(10) | 0.0096(11) |
| C(b8)  | 0.0206(13) | 0.0190(12) | 0.0178(12) | 0.0061(10) | 0.0078(10) | 0.0094(10) |
| C(11)  | 0.0211(13) | 0.0150(12) | 0.0216(12) | 0.0075(10) | 0.0065(10) | 0.0110(10) |
| C(12)  | 0.0259(14) | 0.0154(12) | 0.0309(15) | 0.0108(11) | 0.0093(12) | 0.0080(11) |
| C(13)  | 0.0398(19) | 0.0166(14) | 0.0410(18) | 0.0127(13) | 0.0140(15) | 0.0099(13) |
| C(21)  | 0.0170(12) | 0.0266(14) | 0.0118(11) | 0.0081(10) | 0.0036(9)  | 0.0065(10) |
| C(22)  | 0.0248(14) | 0.0387(17) | 0.0195(13) | 0.0128(13) | 0.0120(11) | 0.0095(13) |
| C(23)  | 0.0213(15) | 0.048(2)   | 0.0288(16) | 0.0183(15) | 0.0079(12) | 0.0001(14) |
| C(31)  | 0.056(2)   | 0.0138(13) | 0.0327(16) | 0.0101(12) | 0.0111(16) | 0.0150(14) |
| C(32a) | 0.029(5)   | 0.020(4)   | 0.038(3)   | 0.019(2)   | 0.016(3)   | 0.012(3)   |

**Table S11.** Continued

| atom   | $U_{11}$   | $U_{22}$   | $U_{33}$   | $U_{23}$   | $U_{13}$   | $U_{12}$   |
|--------|------------|------------|------------|------------|------------|------------|
| C(33a) | 0.029(4)   | 0.047(4)   | 0.044(4)   | 0.018(4)   | 0.009(3)   | 0.024(3)   |
| C(32b) | 0.029(5)   | 0.020(4)   | 0.038(3)   | 0.019(2)   | 0.016(3)   | 0.012(3)   |
| C(33b) | 0.046(4)   | 0.033(4)   | 0.038(4)   | 0.014(3)   | 0.017(3)   | 0.030(3)   |
| C(41)  | 0.0178(12) | 0.0298(14) | 0.0171(12) | 0.0143(11) | 0.0062(10) | 0.0072(11) |
| C(42)  | 0.0203(13) | 0.0344(16) | 0.0195(12) | 0.0166(12) | 0.0067(10) | 0.0089(12) |
| C(43)  | 0.0265(16) | 0.062(2)   | 0.0223(15) | 0.0222(16) | 0.0050(12) | 0.0151(16) |
| Sb(1)  | 0.0174(1)  | 0.0183(1)  | 0.0171(1)  | 0.0078(1)  | 0.0060(1)  | 0.0043(1)  |
| Cl(2)  | 0.0188(4)  | 0.0769(8)  | 0.0626(7)  | 0.0445(6)  | 0.0030(4)  | -0.0025(4) |
| Cl(3)  | 0.0495(5)  | 0.0399(5)  | 0.0600(6)  | 0.0293(5)  | 0.0267(5)  | 0.0316(4)  |
| Cl(4)  | 0.0481(5)  | 0.0397(4)  | 0.0207(3)  | 0.0088(3)  | 0.0189(3)  | 0.0135(4)  |
| Cl(5)  | 0.0482(5)  | 0.0409(5)  | 0.0210(3)  | 0.0163(3)  | 0.0091(3)  | 0.0052(4)  |
| Cl(6)  | 0.0485(5)  | 0.0150(3)  | 0.0267(4)  | 0.0047(3)  | 0.0092(3)  | 0.0081(3)  |
| Cl(7)  | 0.0197(3)  | 0.0286(4)  | 0.0377(4)  | 0.0173(3)  | 0.0063(3)  | 0.0035(3)  |
| Cl(8)  | 0.0480(5)  | 0.0323(4)  | 0.0322(4)  | 0.0117(3)  | 0.0086(4)  | 0.0195(4)  |
| Cl(9)  | 0.0334(4)  | 0.0443(5)  | 0.0390(5)  | 0.0012(4)  | 0.0121(4)  | 0.0098(4)  |
| C(1)   | 0.041(2)   | 0.0330(19) | 0.0354(18) | 0.0087(15) | 0.0078(16) | 0.0019(16) |

<sup>a</sup>The estimated standard deviations of the least significant digits are given in parentheses. The anisotropic displacement factor exponent takes the form:  $-2 \pi [h^2 a^{*2} U_{11} + \dots + 2 h k a^* b^* U_{12}]$ .

**Table S12.** Hydrogen Atom Coordinates and Equivalent Isotropic Displacement Parameters ( $\text{\AA}^2$ ) for  $[\text{Fe}(\text{TPrP}^*)(\text{Cl})]\text{SbCl}_6^a$

| atom   | $x$    | $y$     | $z$     | $U(\text{eq})$ |
|--------|--------|---------|---------|----------------|
| H(b1)  | 0.1384 | 0.3087  | -0.0445 | 0.024          |
| H(b2)  | 0.1241 | 0.1631  | -0.1937 | 0.023          |
| H(b3)  | 0.1480 | -0.2205 | -0.2820 | 0.023          |
| H(b4)  | 0.1889 | -0.3264 | -0.1910 | 0.026          |
| H(b5)  | 0.2215 | -0.2770 | 0.1642  | 0.028          |
| H(b6)  | 0.2258 | -0.1349 | 0.3106  | 0.027          |
| H(b7)  | 0.2495 | 0.2593  | 0.4072  | 0.023          |
| H(b8)  | 0.2126 | 0.3668  | 0.3169  | 0.023          |
| H(1a)  | 0.1262 | 0.3971  | 0.1966  | 0.022          |
| H(1b)  | 0.1123 | 0.3822  | 0.0888  | 0.022          |
| H(1c)  | 0.3823 | 0.4500  | 0.2421  | 0.028          |
| H(1d)  | 0.3698 | 0.4331  | 0.1339  | 0.028          |
| H(1e)  | 0.2611 | 0.5677  | 0.1512  | 0.048          |
| H(1f)  | 0.4193 | 0.6113  | 0.2303  | 0.048          |
| H(1g)  | 0.2797 | 0.5861  | 0.2603  | 0.048          |
| H(2a)  | 0.0941 | 0.0158  | -0.2908 | 0.023          |
| H(2b)  | 0.0629 | -0.1064 | -0.3213 | 0.023          |
| H(2c)  | 0.3148 | -0.0838 | -0.2832 | 0.032          |
| H(2d)  | 0.2605 | -0.0446 | -0.3641 | 0.032          |
| H(2e)  | 0.3562 | 0.1297  | -0.2450 | 0.051          |
| H(2f)  | 0.4802 | 0.0755  | -0.2485 | 0.051          |
| H(2g)  | 0.4118 | 0.0901  | -0.1645 | 0.051          |
| H(3a)  | 0.1559 | -0.3751 | 0.0049  | 0.041          |
| H(3b)  | 0.1869 | -0.3788 | -0.0906 | 0.041          |
| H(32a) | 0.3514 | -0.4195 | 0.0064  | 0.031          |
| H(32b) | 0.4021 | -0.3017 | 0.0875  | 0.031          |
| H(33a) | 0.4078 | -0.3536 | -0.1052 | 0.059          |
| H(33b) | 0.5486 | -0.3218 | -0.0143 | 0.059          |
| H(33c) | 0.4684 | -0.2381 | -0.0199 | 0.059          |
| H(32c) | 0.4406 | -0.2953 | -0.0287 | 0.031          |
| H(32d) | 0.4494 | -0.2787 | 0.0788  | 0.031          |
| H(33d) | 0.3851 | -0.4621 | 0.0278  | 0.054          |
| H(33e) | 0.5298 | -0.4206 | 0.0085  | 0.054          |
| H(33f) | 0.3789 | -0.4779 | -0.0790 | 0.054          |

**Table S12.** Continued

| atom  | $x$    | $y$    | $z$    | $U(\text{eq})$ |
|-------|--------|--------|--------|----------------|
| H(4a) | 0.1990 | 0.0036 | 0.3987 | 0.024          |
| H(4b) | 0.2001 | 0.1215 | 0.4261 | 0.024          |
| H(4c) | 0.4526 | 0.0554 | 0.4332 | 0.028          |
| H(4d) | 0.4561 | 0.1729 | 0.4556 | 0.028          |
| H(4e) | 0.3948 | 0.1916 | 0.5925 | 0.054          |
| H(4f) | 0.5283 | 0.1467 | 0.5994 | 0.054          |
| H(4g) | 0.3679 | 0.0706 | 0.5667 | 0.054          |
| H(1h) | 1.2263 | 0.5782 | 0.5194 | 0.049          |
| H(1i) | 1.3273 | 0.5196 | 0.5591 | 0.049          |

<sup>a</sup> $U(\text{eq})$  is defined as one third of the trace of the orthogonalized  $\mathbf{U}_{ij}$  tensor. The estimated standard deviations of the least significant digits are given in parentheses.
